# Supplementary material for: Enhancing photocatalytic activity of one-dimensional KNbO3 nanowires by Au nanoparticles under ultraviolet and visible-light
Source: Royal Society of Chemistry journal article supplement (doi:10.1039/c1nr10953g), 2011-01-01
Supplement: c1nr10953g.pdf [file c1nr10953g.pdf]

# Supplementary Information

## Enhancing Photocatalytic Activity of One-Dimensional KNbO<sub>3</sub> Nanowires by Au Nanoparticles Under Ultraviolet and Visible-light

Jinyao Lan,<sup>†,‡</sup> Xuemei Zhou,<sup>†</sup> Gang Liu<sup>\*,†</sup>  
Jianguo Yu,<sup>§</sup> Jingchang Zhang,<sup>‡</sup>  
Linjie Zhi,<sup>\*,†</sup> and Guangjun Nie<sup>\*,†</sup>

<sup>†</sup>National Center for Nanoscience and Technology  
Beijing 100190, China

<sup>‡</sup>Institute of Modern Catalysis, Beijing University of Chemical Technology  
State Key Laboratory of Chemical Resource Engineering  
Beijing 100029, China

<sup>§</sup>State Key Laboratory of Advanced Technology for Materials Synthesis and Processing  
Wuhan University of Technology  
Wuhan 430070, China

\* To whom all correspondence should be addressed.

E-mail: liug@nanoctr.cn

zhilj@nanoctr.cn

niegj@nanoctr.cn

Fax: (+86) 10-62656765

<sup>†</sup> National Center for Nanoscience and Technology.

<sup>‡</sup> Beijing University of Chemical Technology.

<sup>§</sup> Wuhan University of Technology.

## Figure Captions

**Figure S1.** SEM image of commercial bulk-like KNbO<sub>3</sub> from Alfa Aesar.

**Figure S2.** Nitrogen adsorption and desorption isotherms measured at 77 K and BJH pore size distribution for NWs (a-b), NRs (c-d) and commercial KNbO<sub>3</sub> (e-f). The BET surface area for NWs, NRs, and commercial KNbO<sub>3</sub> is measured to be 4.8, 3.25 and 1.0 m<sup>2</sup>/g, respectively.

**Figure S3.** UV-vis spectral changes of RhB aqueous solutions as a function of UV irradiation time. (a) NWs. (b) NRs. (c) Commercial. Reaction conditions: RhB concentration 1×10<sup>-5</sup> M; catalyst concentration 1 g/L; 300 W Xe-lamp (UV bandpass at 365 nm, light intensity is 158 mW/cm<sup>2</sup>).

**Figure S4.** UV-vis spectral changes of RhB aqueous solutions as a function of irradiation time. (a) Au 4.2 wt% on NWs under UV. (b) Au 8.0 wt% on NWs under UV. (c) Au 4.2 wt% on NWs under visible-light. (d) Au 8.0 wt% on NWs under visible-light. Reaction conditions: RhB concentration 1×10<sup>-5</sup> M; catalyst concentration 1 g/L; 300 W Xe-lamp (visible-light λ>420 nm, light intensity is 230 mW/cm<sup>2</sup>; UV bandpass at 365 nm, light intensity is 158 mW/cm<sup>2</sup>).

**Figure S5.** Valence band structures for KNbO<sub>3</sub> nanostructures before and after Au deposition.

**Table S1.** Comparison of photocatalytic activity of photocatalyst (NWs+Au 8 wt%) with P25 (Degussa). The reaction rate constant ( $k$ ) is normalized to the specific surface area, denoted as  $k_s$  [*J. Phys. Chem. C* **2010**, *114*, 17051-17061].

$k_s = k / (\text{catalyst concentration} \times \text{SSA})$ , herein the catalyst concentration is 1 g/L.

|              | $k$ ( $\text{min}^{-1}$ ) | SSA ( $\text{m}^2/\text{g}$ ) | $k_s$ ( $\text{min}^{-1}\text{Lm}^{-2}$ ) |
|--------------|---------------------------|-------------------------------|-------------------------------------------|
| P25          | 0.151                     | 50                            | $3.02 \times 10^{-3}$                     |
| NWs+Au 8 wt% | 0.0162                    | 5.0                           | $3.22 \times 10^{-3}$                     |

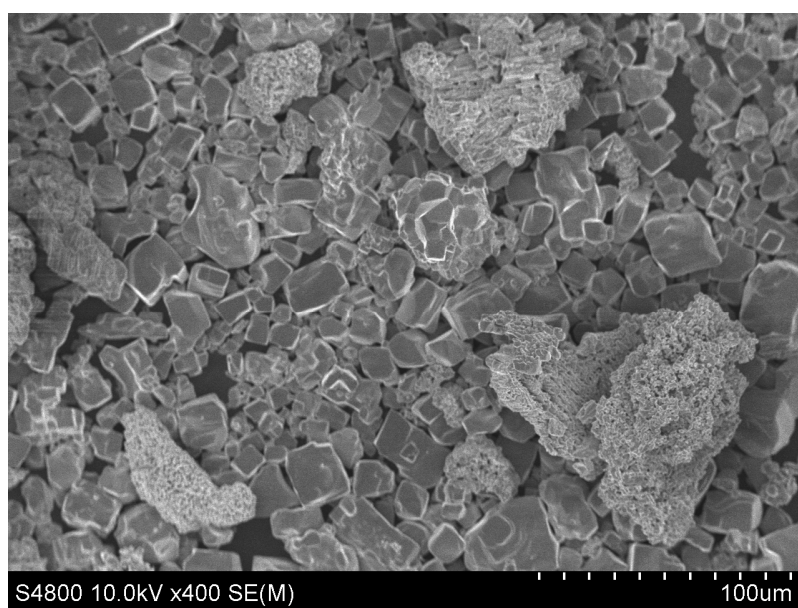

**Figure S1.**

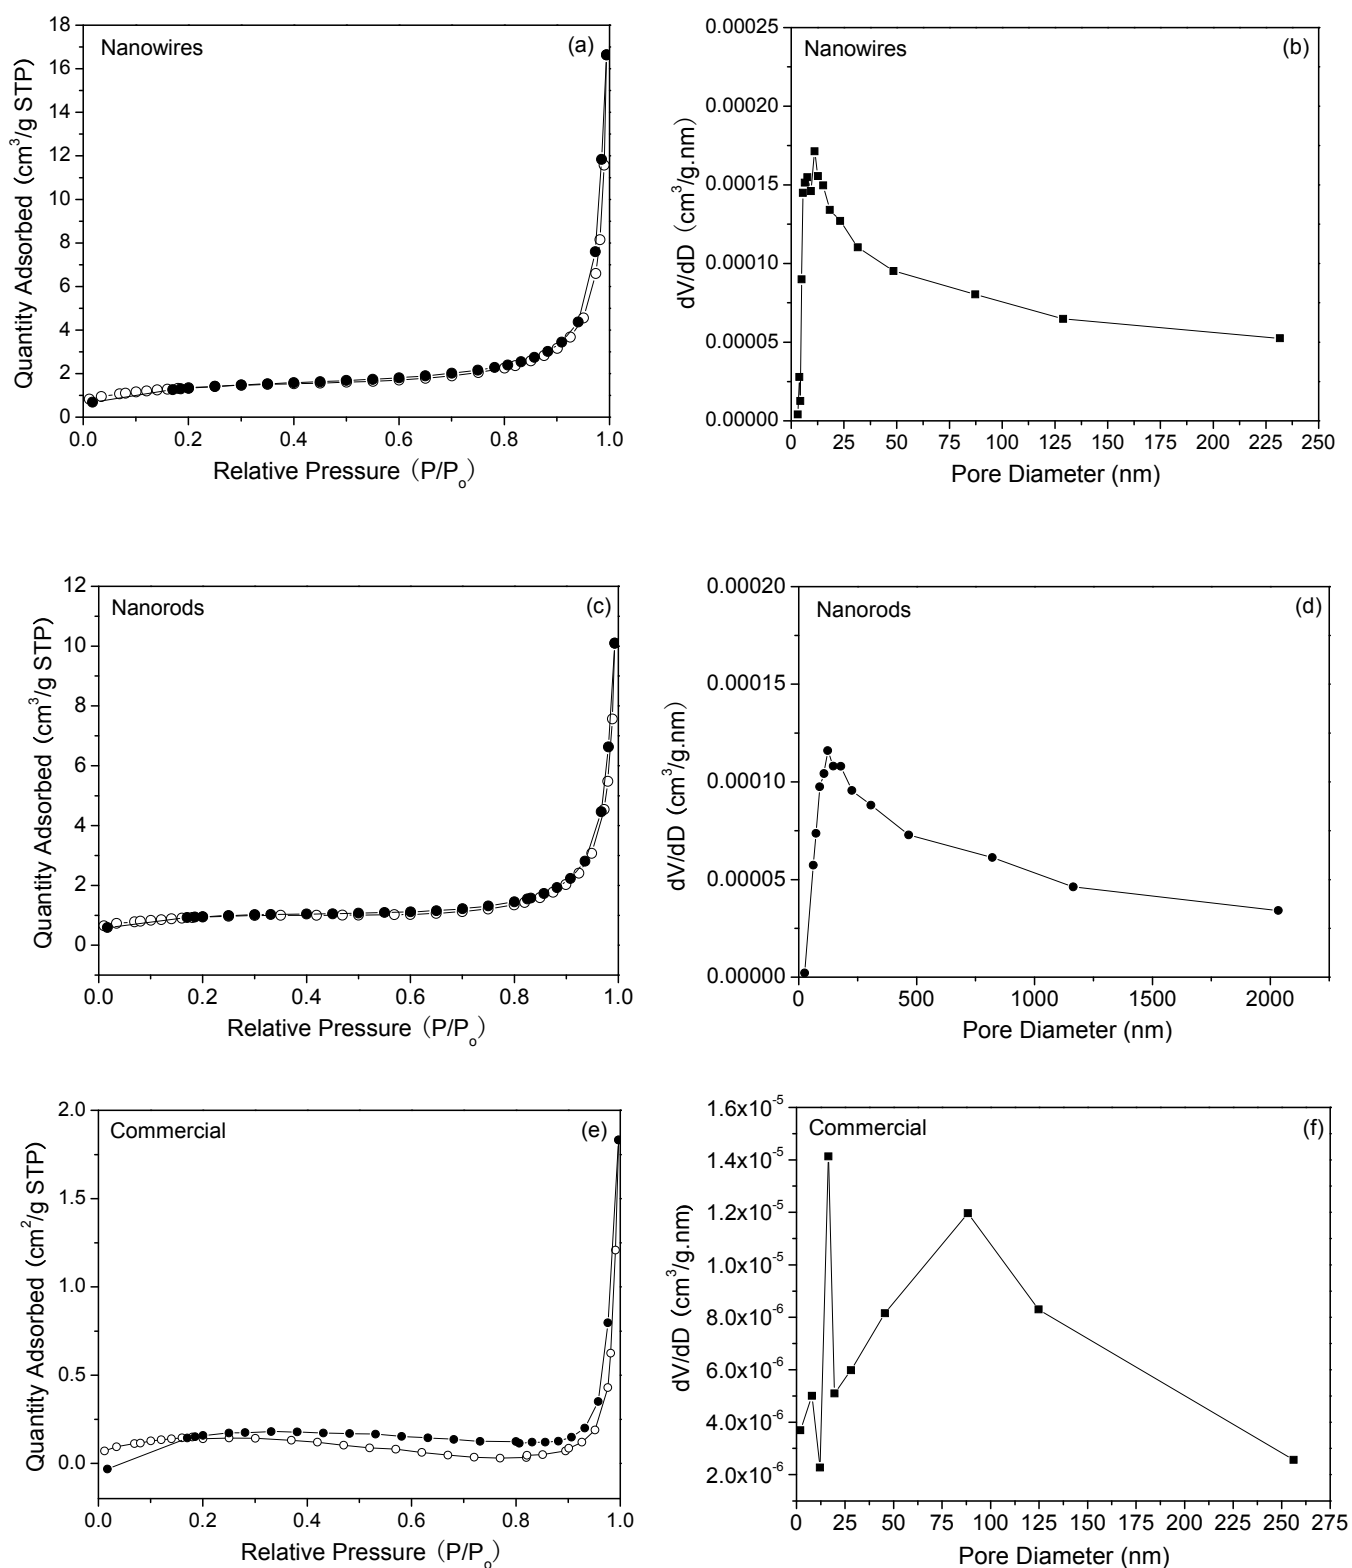

**Figure S2 (a-f).**



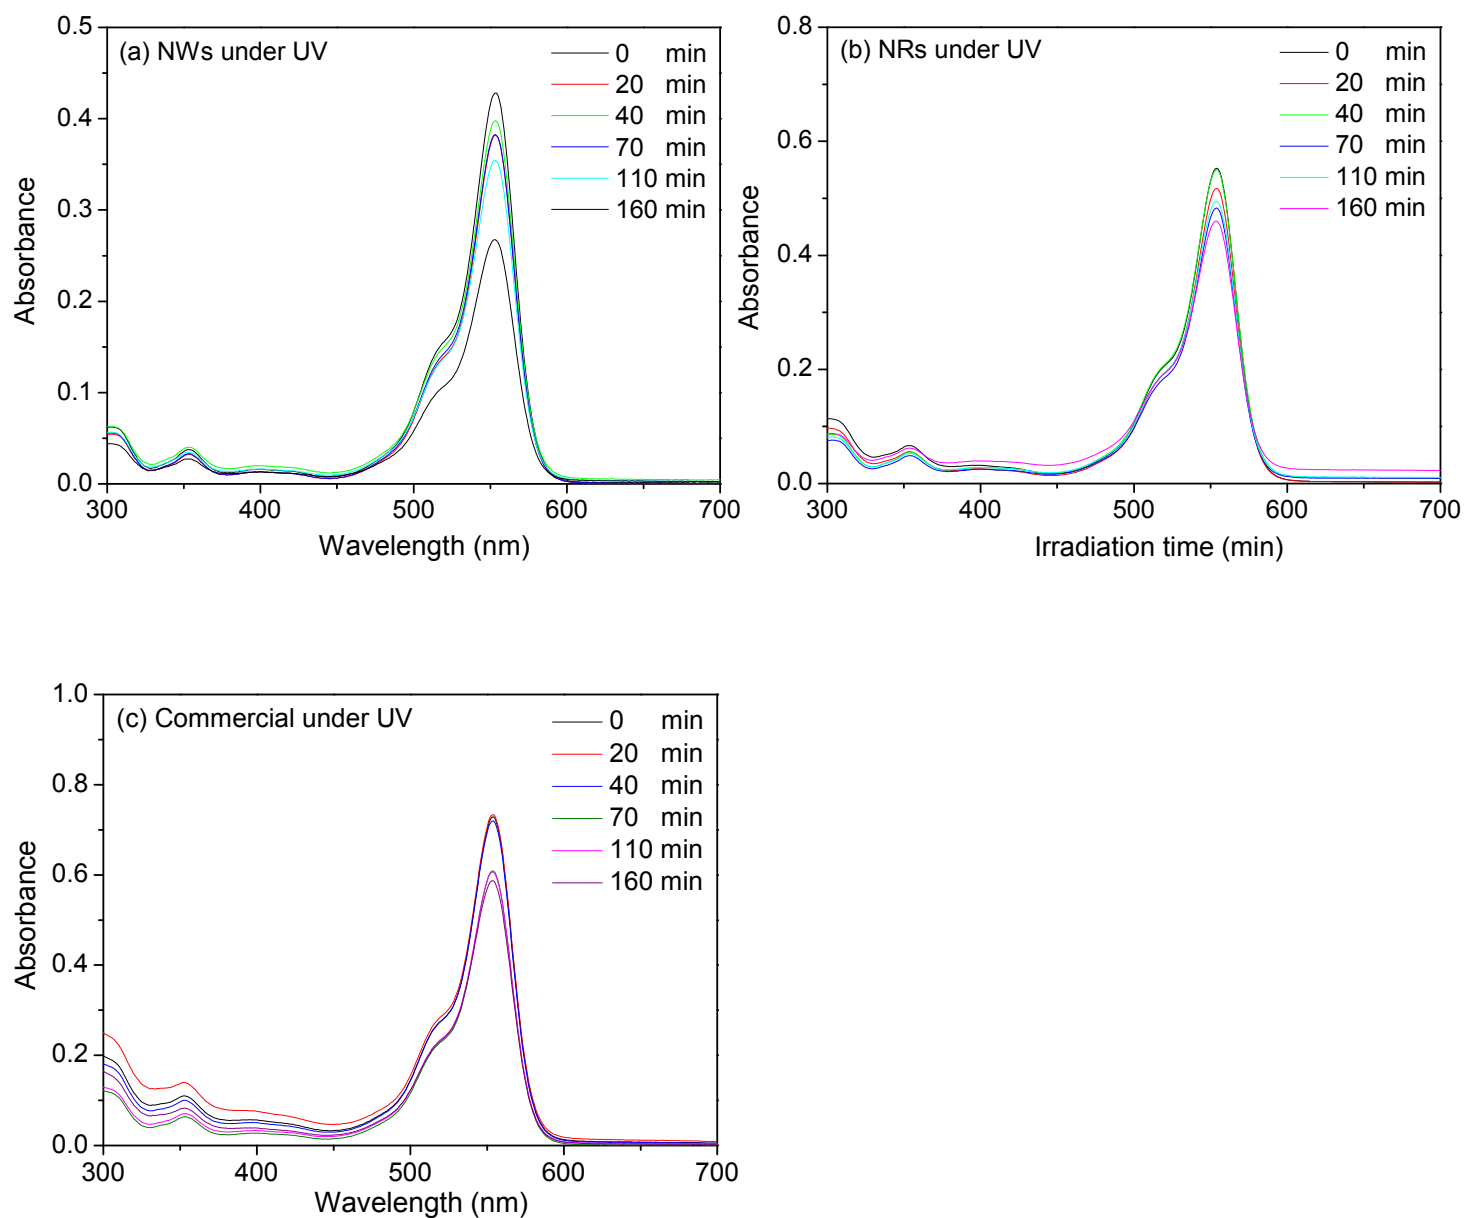

**Figure S3 (a-c).**

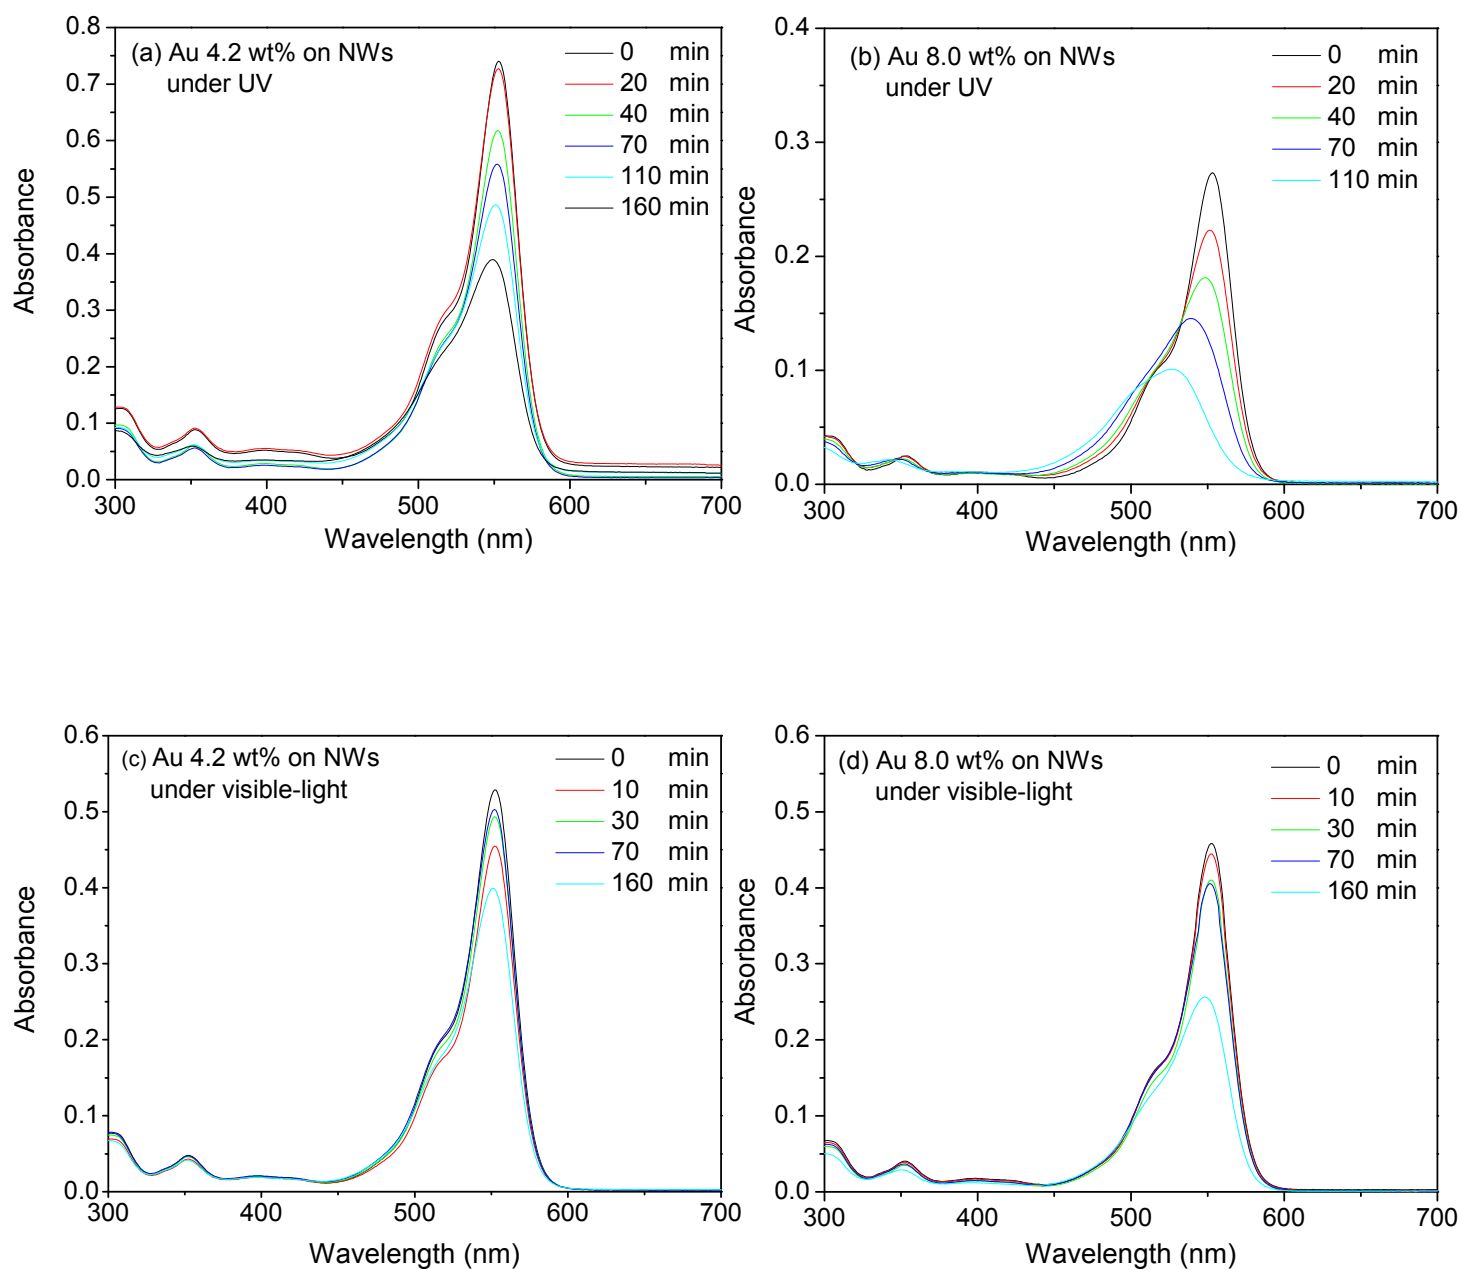

**Figure S4 (a-d).**



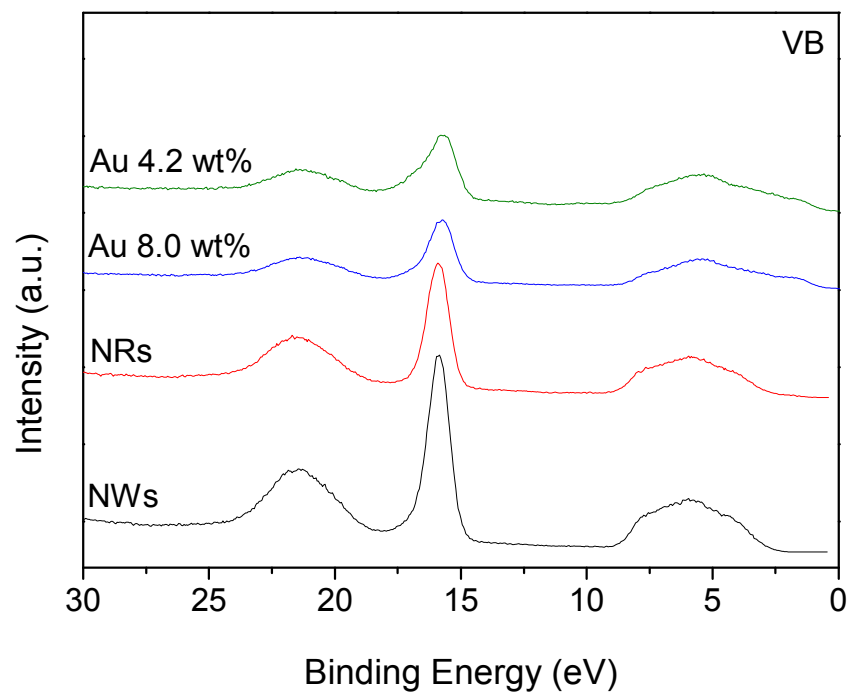

**Figure S5.**
